# Supplementary material for: Long-Term Behavior of Simulated Partial Lead Service Line Replacements
Source: PubMed Central journal article supplement — Environ Eng Sci. 2016 Jan 1;33(1):53–64. doi: 10.1089/ees.2015.0337 (PMC4770854; doi:10.1089/ees.2015.0337), 2016-01-01
Supplement: Supp_Figure1.pdf [file Supp_Figure1.pdf]

## Supplementary Data

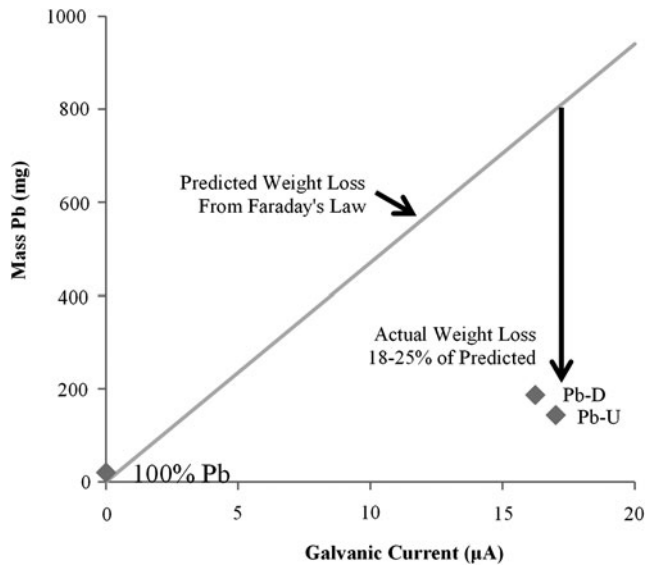

**SUPPLEMENTARY FIG. S1.** Average weight loss versus average sacrificial current of 10 cm Pb coupon located immediately adjacent to copper pipe versus the estimated weight loss calculated by Faraday's Law.
