# Supplementary material for: Long-Term Behavior of Simulated Partial Lead Service Line Replacements
Source: PubMed Central journal article supplement — Environ Eng Sci. 2016 Jan 1;33(1):53–64. doi: 10.1089/ees.2015.0337 (PMC4770854; doi:10.1089/ees.2015.0337), 2016-01-01
Supplement: Supp_Figure3.pdf [file Supp_Figure3.pdf]

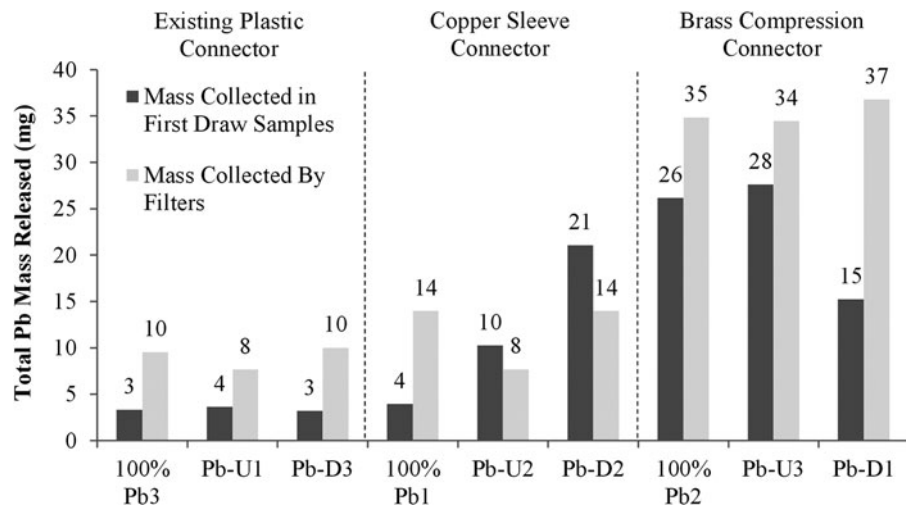

**SUPPLEMENTARY FIG. S3.** Total mass released in first 2 L draws during prolonged stagnation events during Phase D, months 26–27, and total mass captured by filters during Phase E, months 35–48 (Note: During one sampling period, Rig Pb-U3 malfunctioned, resulting in no flow for a period of 3 months).
