# Supplementary material for: Long-Term Behavior of Simulated Partial Lead Service Line Replacements
Source: PubMed Central journal article supplement — Environ Eng Sci. 2016 Jan 1;33(1):53–64. doi: 10.1089/ees.2015.0337 (PMC4770854; doi:10.1089/ees.2015.0337), 2016-01-01
Supplement: Supp_Figure4.pdf [file Supp_Figure4.pdf]

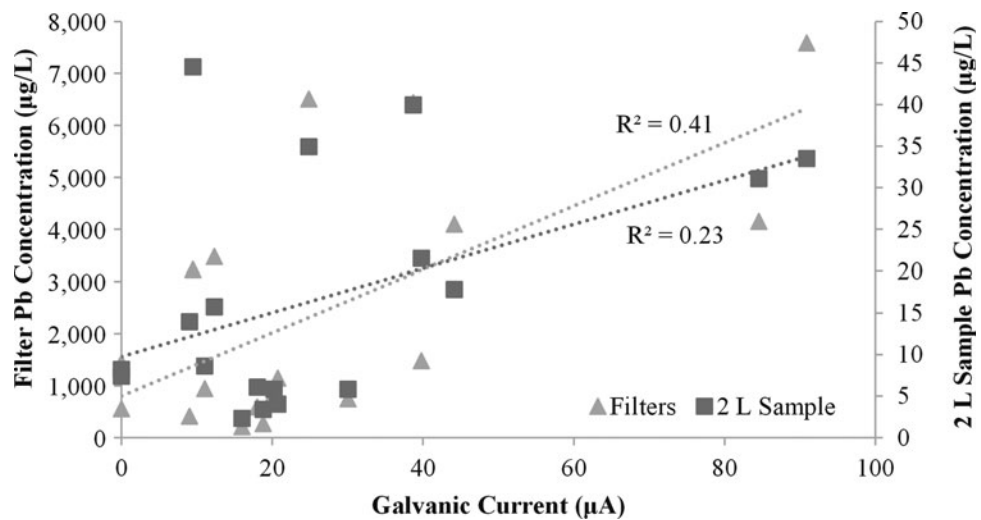

**SUPPLEMENTARY FIG. S4.** Lead concentration in water collected from both filter samples and 2L draw compared to average galvanic current during that same time period.
