# Supplementary figures and images for: Long-Term Behavior of Simulated Partial Lead Service Line Replacements
Source: PubMed Central journal article supplement — Environ Eng Sci. 2016 Jan 1;33(1):53–64. doi: 10.1089/ees.2015.0337 (PMC4770854; doi:10.1089/ees.2015.0337), 2016-01-01

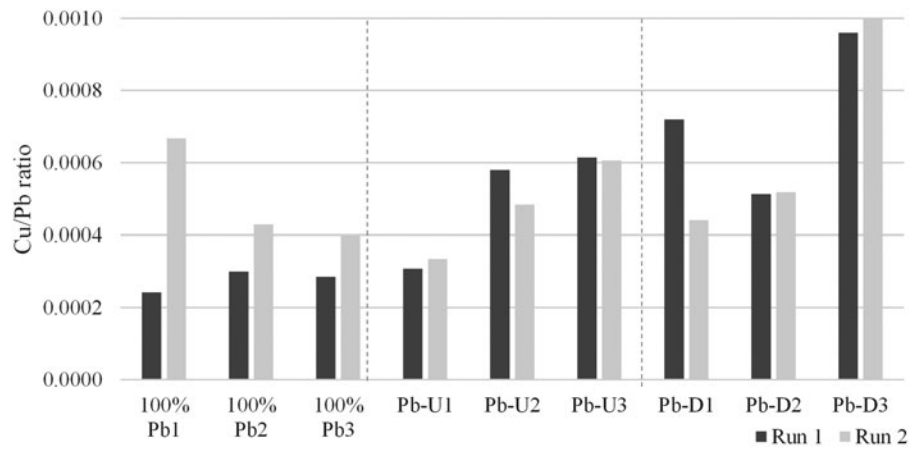

**SUPPLEMENTARY FIG. S2.** Mass ratio of copper/lead in rust removed from short Pb sections.

Supplement: Supp_Figure2.pdf [file Supp_Figure2.pdf]
